# Supplementary material for: Cost-effectiveness analysis of percutaneous coronary intervention for single-vessel coronary artery disease: an economic evaluation of the ORBITA trial
Source: PubMed Central journal article supplement (PMC7875263; doi:10.1136/bmjopen-2020-044054), 2021-02-09
Supplement: bmjopen-2020-044054supp001.pdf [file bmjopen-2020-044054supp001.pdf]

Parameters: ORBITA economic model

| Parameter                                                               | Mean value | Probabilistic distribution | Source                                 |
|-------------------------------------------------------------------------|------------|----------------------------|----------------------------------------|
| Cost of PCI                                                             | 1782       | NA                         | HRG:EY41D, 2019/20 NHS National Tariff |
| Cost of Cardiology outpatient visit                                     | 78         | NA                         | 2019/20 NHS National Tariff            |
| <b>Weekly cost of pharmaceuticals</b>                                   |            |                            |                                        |
| Aspirin                                                                 | 0.13       | NA                         | January 2019 NHS drug tariff           |
| Clopidogrel                                                             | 0.33       | NA                         | January 2019 NHS drug tariff           |
| Statin                                                                  | 0.24       | NA                         | January 2019 NHS drug tariff           |
| ACE inhibitor                                                           | 0.53       | NA                         | January 2019 NHS drug tariff           |
| Beta Blocker                                                            | 0.15       | NA                         | January 2019 NHS drug tariff           |
| Calcium Channel Blocker                                                 | 0.16       | NA                         | January 2019 NHS drug tariff           |
| Nitrate                                                                 | 0.25       | NA                         | January 2019 NHS drug tariff           |
| Nicorandil                                                              | 0.8        | NA                         | January 2019 NHS drug tariff           |
| Ranolazine                                                              | 11.43      | NA                         | January 2019 NHS drug tariff           |
| <b>Total weekly cost without anti-angina drugs (PCI group scenario)</b> | 1.11       | NA                         |                                        |
| <b>Probability of taking drug type</b>                                  |            |                            |                                        |
| PCI group                                                               |            |                            |                                        |
| Aspirin                                                                 | 0.99       | Beta                       | ORBITA Trial                           |
| Clopidogrel                                                             | 1          | Beta                       | ORBITA Trial                           |
| Statin                                                                  | 0.97       | Beta                       | ORBITA Trial                           |
| ACE inhibitor                                                           | 0.81       | Beta                       | ORBITA Trial                           |
| Beta Blocker                                                            | 0.81       | Beta                       | ORBITA Trial                           |
| Calcium Channel Blocker                                                 | 0.91       | Beta                       | ORBITA Trial                           |
| Nitrate                                                                 | 0.66       | Beta                       | ORBITA Trial                           |
| Nicorandil                                                              | 0.48       | Beta                       | ORBITA Trial                           |
| Ranolazine                                                              | 0.07       | Beta                       | ORBITA Trial                           |
| Placebo group                                                           |            |                            |                                        |
| Aspirin                                                                 | 0.97       | Beta                       | ORBITA Trial                           |
| Clopidogrel                                                             | 0.98       | Beta                       | ORBITA Trial                           |
| Statin                                                                  | 0.96       | Beta                       | ORBITA Trial                           |
| ACE inhibitor                                                           | 0.79       | Beta                       | ORBITA Trial                           |
| Beta Blocker                                                            | 0.76       | Beta                       | ORBITA Trial                           |
| Calcium Channel Blocker                                                 | 0.89       | Beta                       | ORBITA Trial                           |
| Nitrate                                                                 | 0.66       | Beta                       | ORBITA Trial                           |
| Nicorandil                                                              | 0.59       | Beta                       | ORBITA Trial                           |
| Ranolazine                                                              | 0.14       | Beta                       | ORBITA Trial                           |
| <b>Quality of life</b>                                                  |            |                            |                                        |
| CAD (baseline)                                                          | 0.77       | Gamma                      | ORBITA Trial                           |
| Placebo                                                                 | 0.81       |                            | ORBITA Trial                           |
| PCI                                                                     | 0.83       |                            | ORBITA Trial                           |
